# Supplementary material
Source: HighWire-hosted journal article supplement (https://jnm.snmjournals.org/highwire/filestream/95528/field_highwire_adjunct_files/0/225813_Supplemental_Data.pdf)
Supplement: 225813_Supplemental_Data.pdf [file 225813_Supplemental_Data.pdf]

**Supplemental Data for Pereira et al: Temporal modulation of HER2 endocytosis increases pertuzumab tumor uptake and allows for pretargeted molecular imaging**

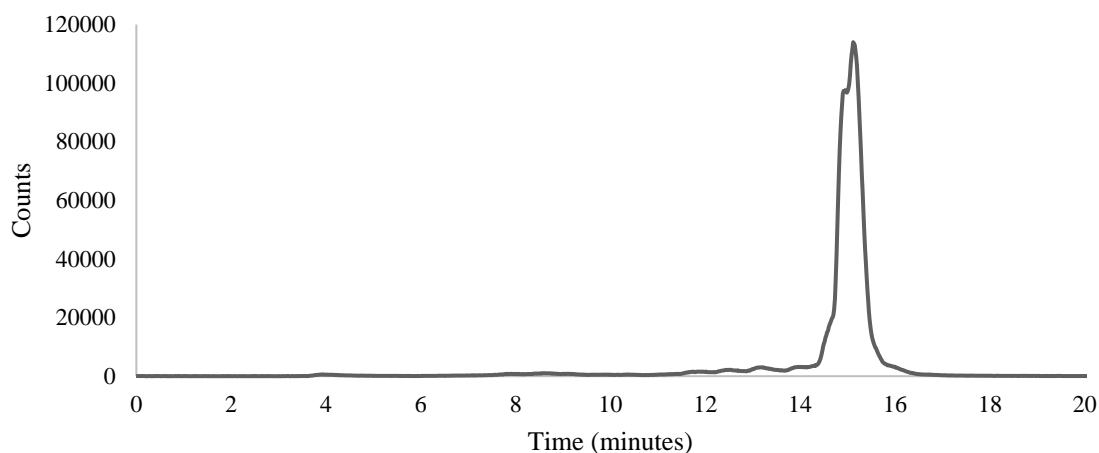

**Supplemental Figure 1.** Representative quality control (QC) radio-HPLC trace for  $^{18}\text{F}$ -labeled Tz, which was obtained with high purity (>98%) and high molar activity (55.5 GBq/ $\mu\text{mol}$ ).

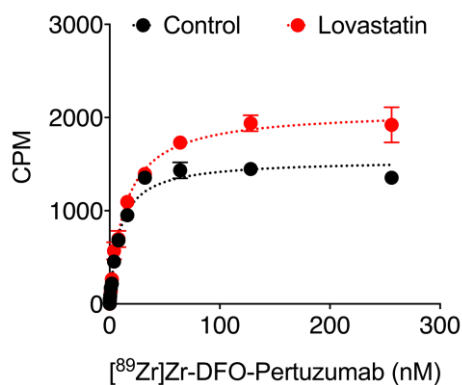

| Condition  | Bmax<br>(HERs/cell x 10 <sup>5</sup> ) |
|------------|----------------------------------------|
| Control    | 3.9                                    |
| Lovastatin | 5.4*                                   |

**Supplemental Figure 2.** Binding kinetics of  $^{89}\text{Zr}$ -labeled pertuzumab in control and lovastatin-treated NCI-N87 cells. NCI-N87 control and lovastatin-treated cells were incubated with  $^{89}\text{Zr}$ -labeled pertuzumab (0 to 256 nM) for 2 h at 4 °C (upper panel). Specific binding of  $^{89}\text{Zr}$ -labeled pertuzumab (red or black circles) and non-linear regression curve fit (dotted lines). Data are presented as mean  $\pm$  S.E.M, n = 3. Binding parameters (lower panel) of  $^{89}\text{Zr}$ -labeled pertuzumab to NCI-N87 cells control or treated with lovastatin (\* $P < 0.05$  based on a Student's t-test).

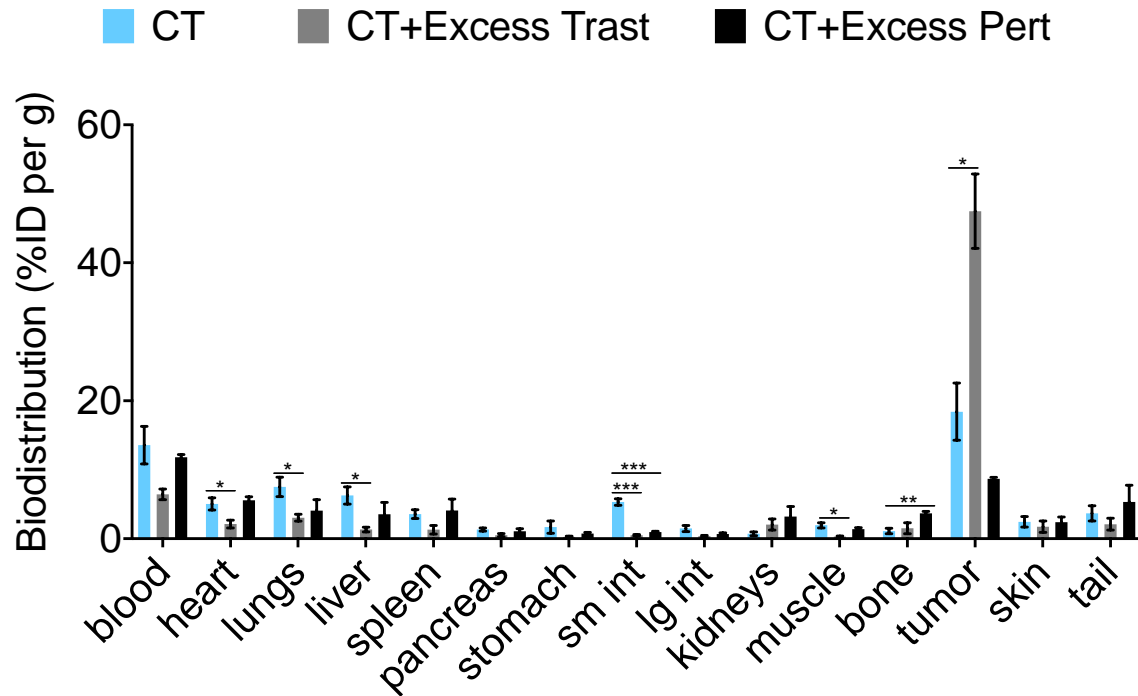

**Supplemental Figure 3.** Biodistribution in control (CT) athymic nude mice bearing subcutaneous NCI-N87 gastric tumors with and without blocking with unlabeled pertuzumab or trastuzumab. [ $^{89}\text{Zr}$ ]Zr-DFO-pertuzumab (4.44-5.18 MBq, 42-49  $\mu\text{g}$  protein) was administered by tail vein injection. Blocking experiments were performed by administration of  $^{89}\text{Zr}$ -labeled pertuzumab in the presence of a 40-fold molar excess of pertuzumab or trastuzumab. Biodistribution studies were performed at 48 h post-injection of  $^{89}\text{Zr}$ -labeled pertuzumab. Data represent the mean  $\pm$  SEM ( $n = 5$  mice per group, \*  $P < 0.05$ , \*\* $P < 0.01$ , and \*\*\* $P < 0.001$  based on a Student's  $t$  test). Tumor-to-organ ratios radioactivity are shown in Supplementary Table 2.

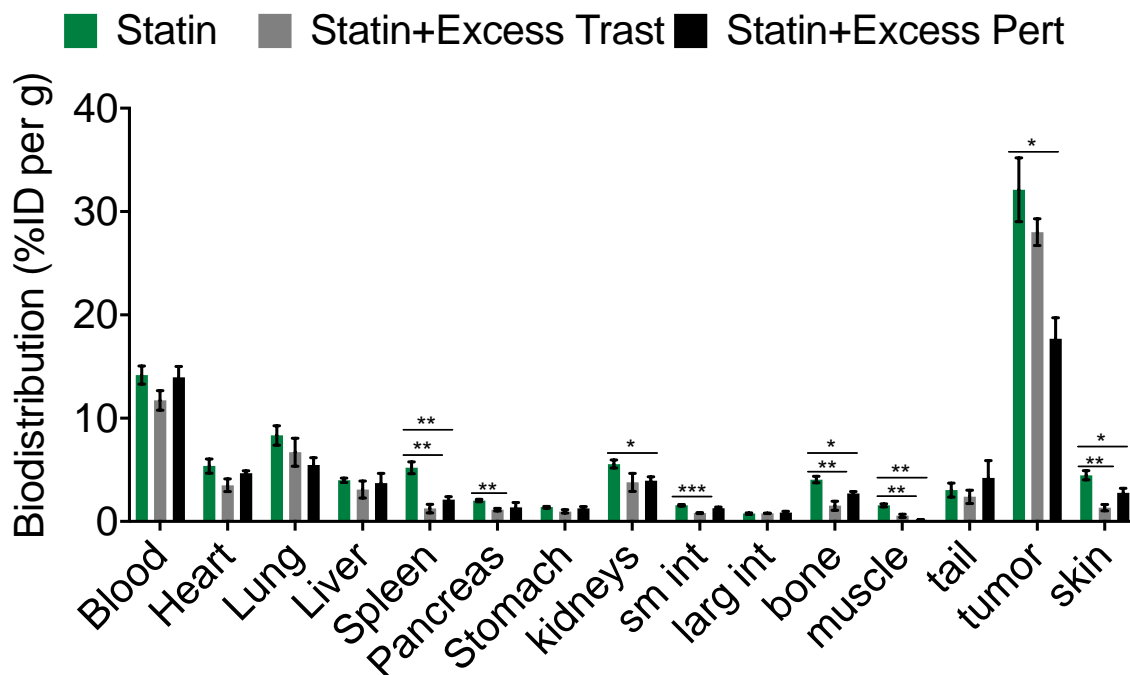

**Supplemental Figure 4.** Biodistribution in lovastatin-treated athymic nude mice bearing subcutaneous NCI-N87 gastric tumors with and without blocking with unlabeled trastuzumab or pertuzumab. Lovastatin (8.3 mg/kg) was orally administered 12 h prior to and at the same time as the tail vein injection of [ $^{89}\text{Zr}$ ]Zr-DFO-pertuzumab (4.44-5.18 MBq, 42-49  $\mu\text{g}$  protein). Blocking experiments were performed by administration of  $^{89}\text{Zr}$ -labeled pertuzumab in the presence of a 40-fold molar excess of trastuzumab or pertuzumab. Biodistribution studies were performed at 48 h post-injection of  $^{89}\text{Zr}$ -labeled pertuzumab. Data represent the mean  $\pm$  SEM, ( $n = 5$  mice per group,  $*P < 0.05$ ,  $**P < 0.01$ , and  $***P < 0.001$  based on a Student's  $t$  test). Tumor-to-organ ratios radioactivity are shown in Supplemental Table 3.

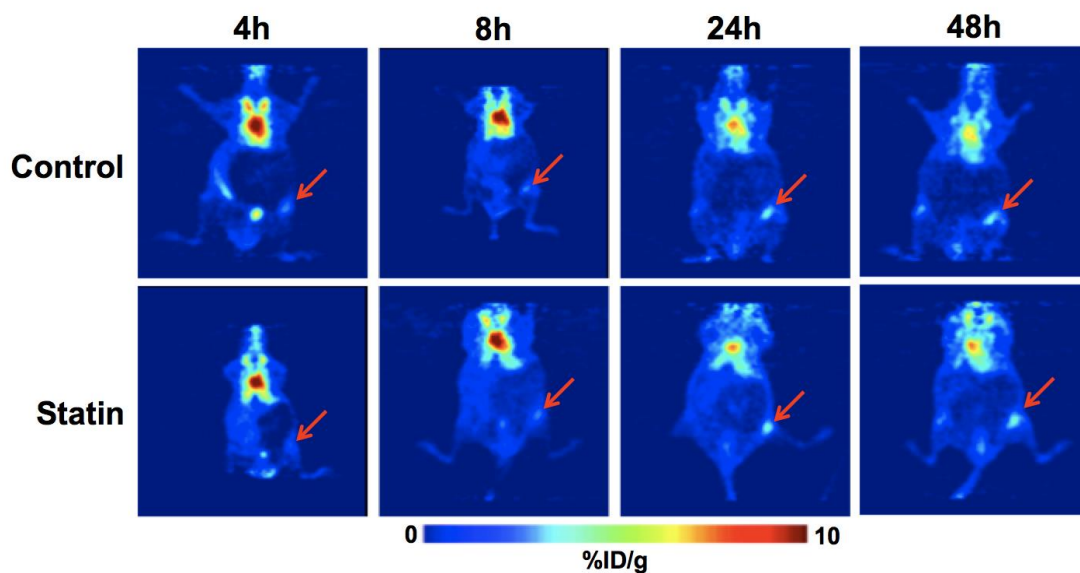

**Supplemental Figure 5.** Representative coronal PET images of [ $^{89}\text{Zr}$ ]Zr-DFO-pertuzumab in athymic nude mice bearing orthotopic MDA-MB-231 mammary fat pad tumors treated with lovastatin. Lovastatin (8.3 mg/kg of mice) was orally administered 12 h prior and at the same time as the tail vein injection of [ $^{89}\text{Zr}$ ]Zr-DFO-pertuzumab (4.44-5.18 MBq, 42-49  $\mu\text{g}$  protein). Control mice received oral saline instead of lovastatin.

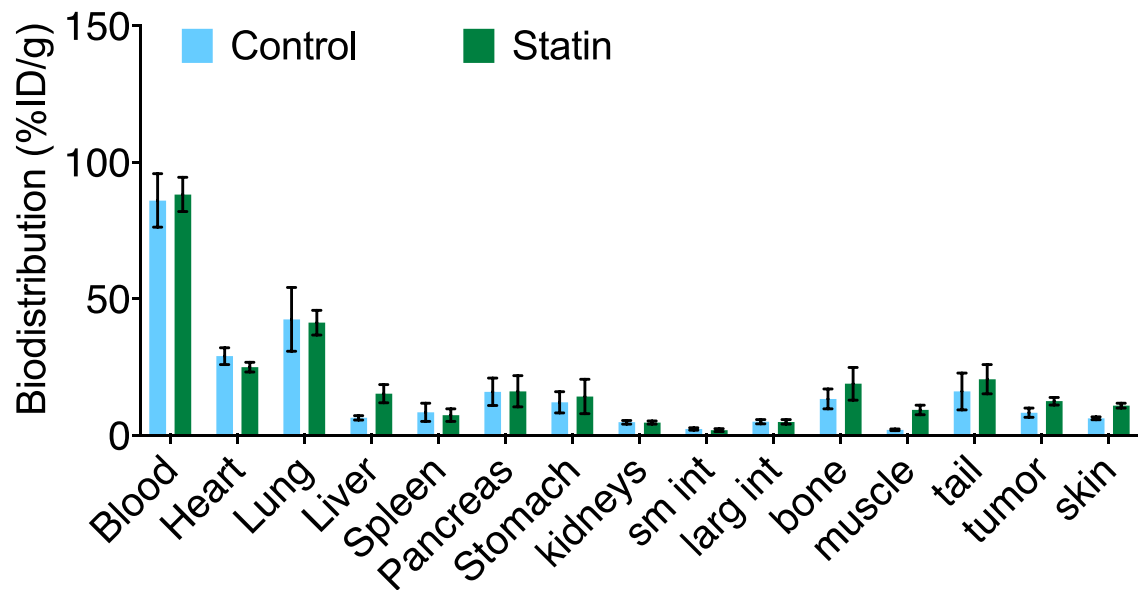

**Supplemental Figure 6.** Biodistribution of  $^{89}\text{Zr}$ -labeled pertuzumab in lovastatin-treated athymic nude mice bearing orthotopic MDA-MB-231 mammary fat pad tumors. Lovastatin (8.3 mg/kg) was orally administered 12 h prior to and at the same time as the tail vein injection of [ $^{89}\text{Zr}$ ]Zr-DFO-pertuzumab (4.44-5.18 MBq, 42-49  $\mu\text{g}$  protein). Biodistribution studies were performed at 48 h post-injection of  $^{89}\text{Zr}$ -labeled pertuzumab. Data represent the mean  $\pm$  SEM, ( $n = 3$  mice per group).

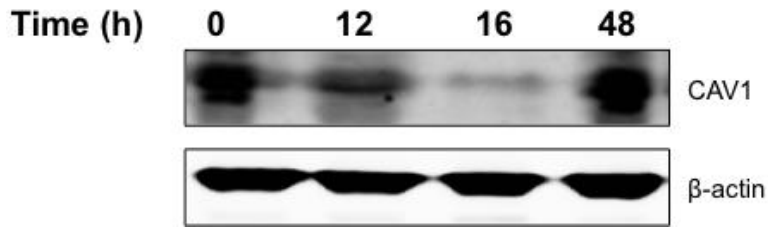

**Supplemental Figure 7.** Western blot of CAV1 in the total cell lysate of NCI-N87 subcutaneous tumors from athymic nude mice. Lovastatin (8.3 mg/kg) was orally administered twice, with an interval of 12 h between each administration. Tumor lysates were prepared at 0, 12, 16, and 48 h after lovastatin administration and analyzed by Western blot.

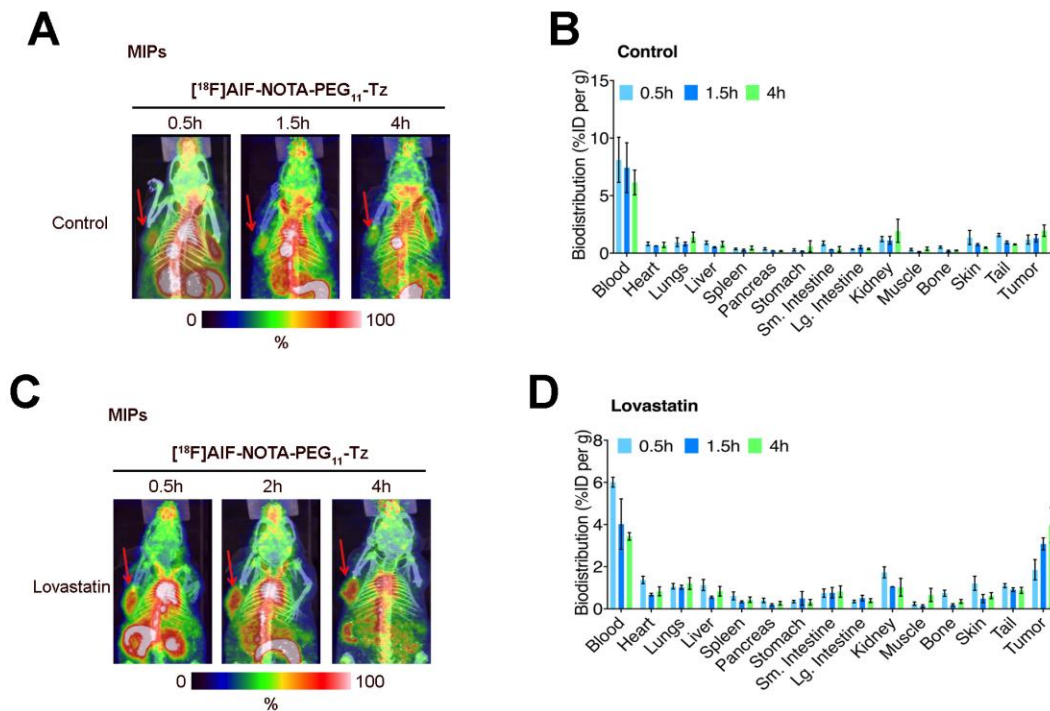

**Supplemental Figure 8.** (A, C) Representative maximum intensity projection PET images (MIPs) and (B, D) biodistribution data at 0.5, 1.5, and 4 h post-injection of  $[^{18}\text{F}]\text{AIF-NOTA-PEG}_{11}\text{-Tz}$  in athymic nude mice bearing subcutaneous gastric tumors. Lovastatin (8.3 mg/kg) was orally administered 12 h prior to and at the same time as the tail vein injection of trastuzumab-TCO, and then at the same time as the tail vein injection of  $[^{18}\text{F}]\text{AIF-NOTA-PEG}_{11}\text{-Tz}$ . Mice were given trastuzumab-TCO (0.42 nmol) 24 h prior to injection of the  $^{18}\text{F}$ -labeled tracer (10.36-11.1 MBq, 0.83 nmol) via the tail vein. Control (CT) mice received with PBS instead of lovastatin. Biodistribution data represent the mean  $\pm$  SEM for five mice.



**Supplemental Table 1.** NCIN87 tumor-to-organ ratios at 48 h after injection of <sup>89</sup>Zr-pertuzumab in control and lovastatin-administrated mice.

|                 | Control | Lovastatin |
|-----------------|---------|------------|
| Blood           | 1.36    | 2.27       |
| Heart           | 3.64    | 5.98       |
| Lung            | 2.45    | 3.85       |
| Liver           | 2.94    | 8.05       |
| Spleen          | 5.16    | 6.17       |
| Pancreas        | 13.75   | 15.84      |
| Stomach         | 10.81   | 23.25      |
| Kidneys         | 3.46    | 5.77       |
| Small intestine | 12.41   | 20.48      |
| Large intestine | 25.39   | 41.55      |
| Bone            | 9.49    | 7.92       |
| Muscle          | 16.37   | 20.48      |
| Tail            | 7.50    | 10.55      |
| Tumor           | 1.00    | 1.00       |
| Skin            | 5.01    | 7.17       |

**Supplemental Table 2.** NCIN87 tumor-to-organ ratios at 48 h after injection of <sup>89</sup>Zr-pertuzumab in control mice after blocking with unlabeled trastuzumab or pertuzumab.

|                 | Control | Control<br>+ Blocking Trastuzumab | Control<br>+ Blocking Pertuzumab |
|-----------------|---------|-----------------------------------|----------------------------------|
| Blood           | 1.36    | 7.39                              | 0.73                             |
| Heart           | 3.64    | 22.39                             | 1.55                             |
| Lungs           | 2.45    | 15.55                             | 2.14                             |
| Liver           | 2.94    | 35.41                             | 2.45                             |
| Spleen          | 5.16    | 36.05                             | 2.11                             |
| Pancreas        | 13.75   | 90.26                             | 8.06                             |
| Stomach         | 10.81   | 168.69                            | 11.29                            |
| Small Intestine | 3.46    | 91.56                             | 9.05                             |
| Large Intestine | 12.41   | 132.13                            | 12.40                            |
| Kidneys         | 25.39   | 22.87                             | 2.71                             |
| Muscle          | 9.49    | 155.00                            | 6.28                             |
| Bone            | 16.37   | 31.23                             | 2.36                             |
| Tumor           | 1.00    | 1.00                              | 1.00                             |
| Skin            | 7.50    | 26.96                             | 3.61                             |
| Tail            | 5.01    | 22.50                             | 1.63                             |

**Supplemental Table 3.** NCIN87 tumor-to-organ ratios at 48 h post-injection of  $^{89}\text{Zr}$ -pertuzumab in statin-treated mice after blocking with unlabeled trastuzumab or pertuzumab.

|                 | Statin | Statin<br>+ Blocking Trastuzumab | Statin<br>+ Blocking Pertuzumab |
|-----------------|--------|----------------------------------|---------------------------------|
| Blood           | 2.27   | 2.39                             | 1.27                            |
| Heart           | 5.98   | 7.99                             | 3.79                            |
| Lung            | 3.85   | 4.17                             | 3.23                            |
| Liver           | 8.05   | 9.04                             | 4.76                            |
| Spleen          | 6.17   | 22.21                            | 8.35                            |
| Pancreas        | 15.84  | 24.40                            | 13.05                           |
| Stomach         | 23.25  | 28.72                            | 13.89                           |
| Kidneys         | 5.77   | 7.39                             | 4.48                            |
| Small Intestine | 20.48  | 34.20                            | 13.73                           |
| Large Intestine | 41.55  | 35.51                            | 20.68                           |
| Bone            | 7.92   | 18.31                            | 6.52                            |
| Muscle          | 20.48  | 50.29                            | 109.99                          |
| Tail            | 10.55  | 11.74                            | 4.19                            |
| Tumor           | 1.00   | 1.00                             | 1.00                            |
| Skin            | 7.17   | 20.91                            | 6.42                            |

**Supplemental Table 4.** NCIN87 tumor-to-organ ratios at 4 h post-injection of  $[^{18}\text{F}]\text{AlF-NOTA-PEG}_{11}\text{-Tz}$  in control and statin-treated mice administrated with pertuzumab-TCO.

|                 | Control | Lovastatin |
|-----------------|---------|------------|
| Blood           | 0.13    | 0.48       |
| Heart           | 0.41    | 1.32       |
| Lung            | 0.31    | 0.97       |
| Liver           | 0.57    | 1.74       |
| Spleen          | 0.82    | 2.73       |
| Pancreas        | 1.08    | 3.81       |
| Stomach         | 1.33    | 4.14       |
| Kidneys         | 0.28    | 0.88       |
| Small Intestine | 0.53    | 2.57       |
| Large Intestine | 4.68    | 4.97       |
| Bone            | 0.70    | 2.71       |
| Muscle          | 2.51    | 4.75       |
| Tail            | 0.72    | 2.09       |
| Tumor           | 1.00    | 1.00       |
| Skin            | 1.23    | 3.87       |
